# Supplementary material for: Degradation of poly(ethylene terephthalate) catalyzed by metal-free choline-based ionic liquids
Source: Royal Society of Chemistry journal article supplement (doi:10.1039/d0gc00327a), 2020-01-01
Supplement: d0gc00327a1.pdf [file d0gc00327a1.pdf]

## Supporting Information

### Degradation of Poly(ethylene terephthalate) Catalyzed by Metal-free Choline-Based Ionic Liquids

Yachan Liu,<sup>a,b</sup> Xiaoqian Yao,<sup>a,c</sup> Haoyu Yao,<sup>a,c</sup> Qing Zhou,<sup>a,c</sup> Jiayu Xin,<sup>a,b,c</sup> Xingmei Lu,<sup>a,b,c,\*</sup> and  
Suojiang Zhang<sup>a,b,\*</sup>

<sup>a</sup>Beijing Key Laboratory of Ionic Liquids Clean Process, CAS Key Laboratory of Green Process and Engineering, State Key Laboratory of Multiphase Complex Systems, Institute of Process Engineering, Chinese Academy of Sciences, Beijing 100190, PR China

<sup>b</sup>Sino Danish College, University of Chinese Academy of Sciences, Beijing 100049, PR China

<sup>c</sup>College of Chemistry and Chemical Engineering, University of Chinese Academy of Sciences, Beijing 100049, PR China

Corresponding Author:

E-mail: xmlu@ipe.ac.cn; sjzhang@ipe.ac.cn

Tel: +86 10 82627080; Fax: +86 10 82544875

## Characterizations of IL

ESI-MS, NMR and FT-IR, as shown in Figure S1, were carried out to identify the structures of the prepared ILs. The results of the chosen catalyst, [Ch][OAc], are mainly displayed here.

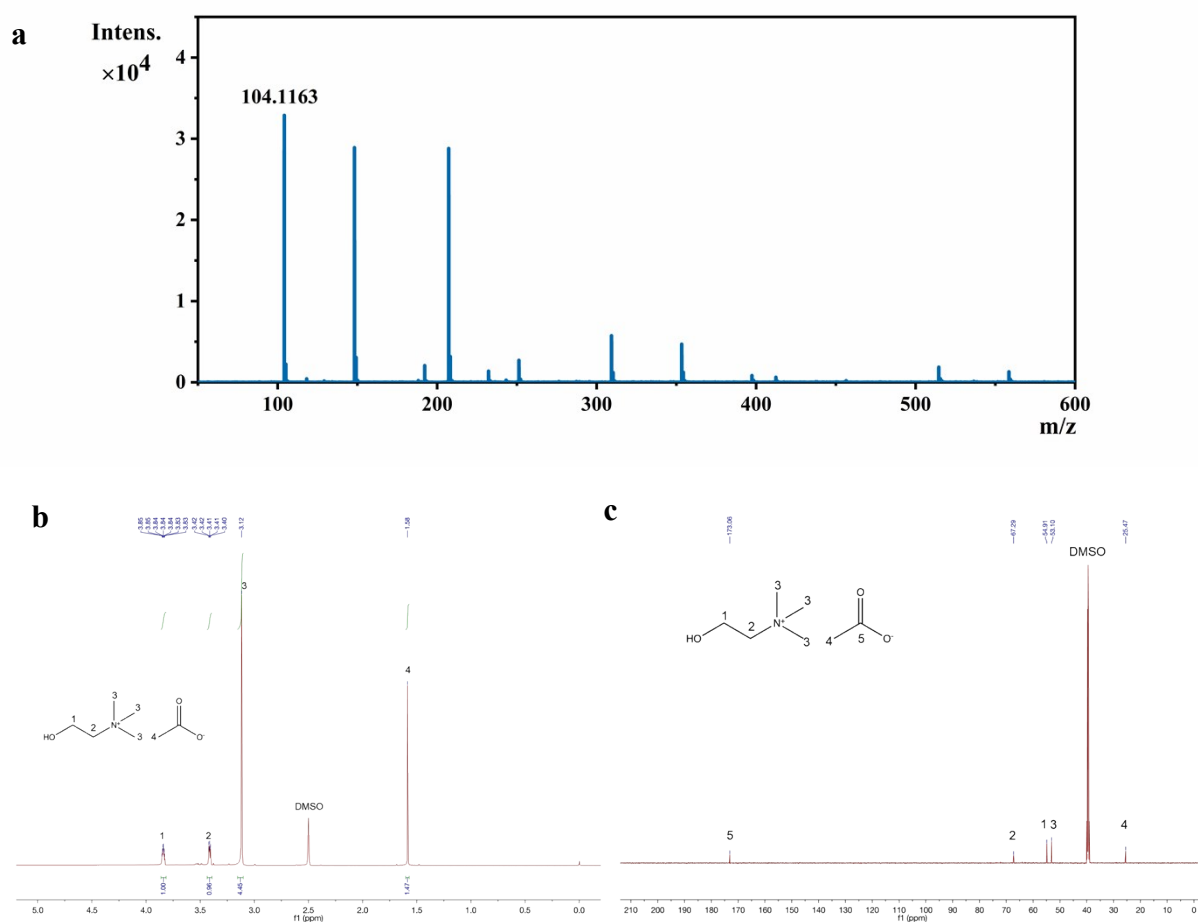

**Figure S1.** (a) ESI-MS patterns, (b)  $^1\text{H}$  NMR spectrum and (c)  $^{13}\text{C}$  NMR spectrum of [Ch][OAc].

The molecular ion peak at  $m/z = 104.1163$  of ESI-MS patterns in Figure S1. (a) is consistent with the molecular weight of  $[\text{Ch}]^+$ , which demonstrates the presence of  $[\text{Ch}]^+$  in the synthesized IL.

The  $^1\text{H}$  NMR and  $^{13}\text{C}$  NMR spectra were reproduced in Figure S1. (b) and (c). The results are as follows:

$^1\text{H}$  NMR ( $d_6$ -DMSO, 600MHz):  $\delta=3.84$  (m, 2H,  $\text{CH}_2\text{OH}$ ), 3.41 (m, 2H,  $\text{CH}_2\text{N}^+$ ), 3.12 (s, 9H,  $(\text{CH}_3)_3\text{N}^+$ ), 1.58 (s, 3H,  $\text{CH}_3\text{CO}$ );

$^{13}\text{C}$  NMR ( $d_6$ -DMSO, 500MHz):  $\delta=181.20$  ( $\text{COO}^-$ ), 67.40 ( $\text{CH}_2\text{N}^+$ ), 55.60 ( $\text{CH}_2\text{OH}$ ), 53.85 ( $(\text{CH}_3)_3\text{N}^+$ ), 23.26 ( $\text{CH}_3\text{CO}$ ).

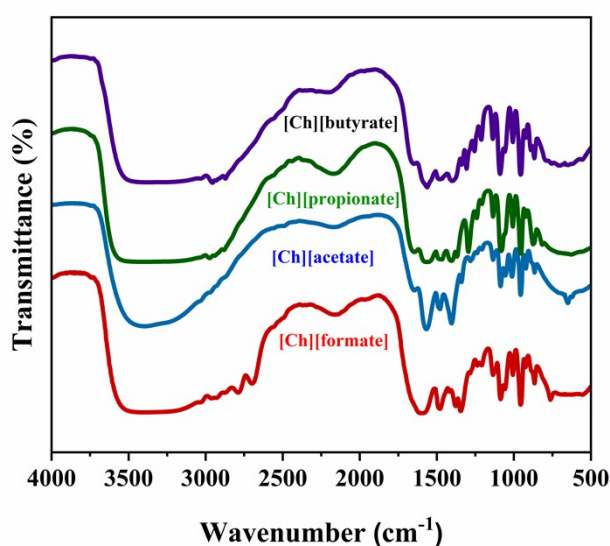

**Figure S2.** FT-IR spectra of choline-based ILs.

The FT-IR spectra are shown in Figure S2. Various ILs show similar curves in the range of 3500-500  $\text{cm}^{-1}$ , which illustrates similarity in their structures. The broad peak between 3500-3000  $\text{cm}^{-1}$  are attributed to the stretching vibration of O-H. The asymmetric stretching vibration and symmetric stretching vibration of methyl group are at 2960  $\text{cm}^{-1}$  and 2870  $\text{cm}^{-1}$ , respectively. Under cover of the O-H broad peak, the intensity of peaks of methyl group is reduced. Absorbance at 1560  $\text{cm}^{-1}$  and 1400  $\text{cm}^{-1}$  ascribe to the asymmetric stretching vibration and symmetric stretching vibration of C=O bonds in carboxylate anions, respectively.

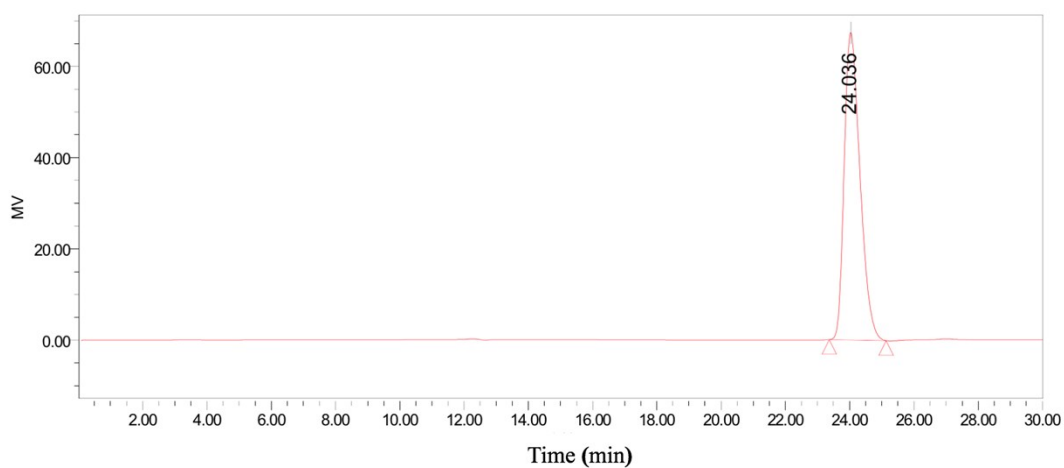

**Figure S3.** HPLC spectrum of the main product

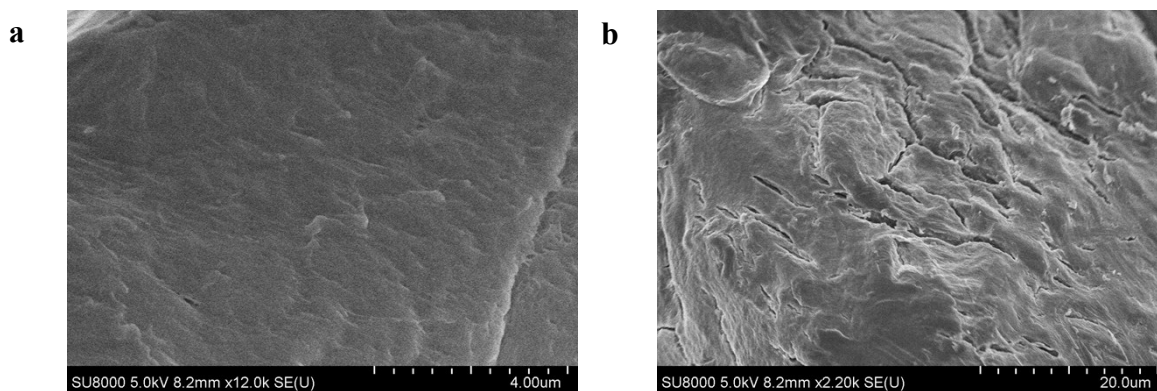

**Figure S4.** SEM spectra of (a) original PET and (b) residual PET

**Table S1.** Elemental analysis results of the main product (BHET)

| Sample        | C (%) | H (%) | O (%) |
|---------------|-------|-------|-------|
| BHET standard | 56.69 | 5.55  | 37.76 |
| BHET          | 56.89 | 5.63  | 37.79 |
